# Supplementary material
Source: MDPI journal article supplement (https://www.mdpi.com/2077-1444/8/2/24)

---

# SCALES IN THE NERSH DATA POOL

Variable names, response formats for each instrument, factor loadings, uniqueness, Eigen-values and Scree plots.

Author: Alex K. Kørup, [akorup@health.sdu.dk](mailto:akorup@health.sdu.dk)

Date: 6<sup>th</sup> of February 2017

## CONTENTS

|                                                                |    |
|----------------------------------------------------------------|----|
| DUREL .....                                                    | 2  |
| Details of factor analysis .....                               | 2  |
| Scree plot .....                                               | 3  |
| Religiosity of HPs.....                                        | 4  |
| Details of factor analysis .....                               | 4  |
| Scree plot .....                                               | 5  |
| Willingness to interact with patients regarding R/S .....      | 6  |
| Details of factor analysis .....                               | 7  |
| Scree plot .....                                               | 7  |
| Religious Objections to Controversial Issues in Medicine ..... | 8  |
| Details of factor analysis .....                               | 8  |
| Scree plot .....                                               | 9  |
| R/S as a Calling .....                                         | 10 |
| Details of factor analysis .....                               | 11 |
| Scree plot .....                                               | 11 |

## DUREL

| Variable name   | Item text                                                                                                                                                                                                                                     | Factor loading | Uniqueness |
|-----------------|-----------------------------------------------------------------------------------------------------------------------------------------------------------------------------------------------------------------------------------------------|----------------|------------|
| <b>B29durel</b> | How often do you attend religious services?<br><br>1. Never<br>2. Twice a year or less<br>3. Several times a year<br>4. 1-3 times a month<br>5. Weekly<br>6. Several times a week                                                             | 0.7939         | 0.3697     |
| <b>au27</b>     | How often do you spend time in private religious activities, such as prayer, meditation or Bible study?<br><br>1. Never<br>2. Twice a year or less<br>3. Several times a year<br>4. 1-3 times a month<br>5. Weekly<br>6. Several times a week | 0.8320         | 0.3077     |
| <b>au28</b>     | In my life, I experience the presence of the Divine (i.e. God).<br><br>1. Strongly disagree<br>2. Disagree<br>3. Agree<br>4. Strongly agree                                                                                                   | 0.8850         | 0.2169     |
| <b>B32ginc</b>  | To what extent do you agree with the following statements. <b>I try hard to carry my religious beliefs over into all my other dealings in life</b><br><br>1. Strongly disagree<br>2. Disagree<br>3. Agree<br>4. Strongly agree                | 0.9170         | 0.1592     |
| <b>B32hinc</b>  | To what extent do you agree with the following statements. <b>My whole approach to life is based on my religion</b><br><br>1. Strongly disagree<br>2. Disagree<br>3. Agree<br>4. Strongly agree                                               | 0.9118         | 0.1687     |

## DETAILS OF FACTOR ANALYSIS

| Detail                  | Value                       |
|-------------------------|-----------------------------|
| <b>Number of obs</b>    | 684                         |
| <b>Method</b>           | principal-component factors |
| <b>Retained factors</b> | 1                           |
| <b>Rotation</b>         | (unrotated)                 |
| <b>Number of params</b> | 5                           |

| Factor   | Eigenvalue |
|----------|------------|
| Factor 1 | 3.77783    |
| Factor 2 | 0.46136    |
| Factor 3 | 0.37218    |
| Factor 4 | 0.24509    |
| Factor 5 | 0.14355    |

## SCREE PLOT

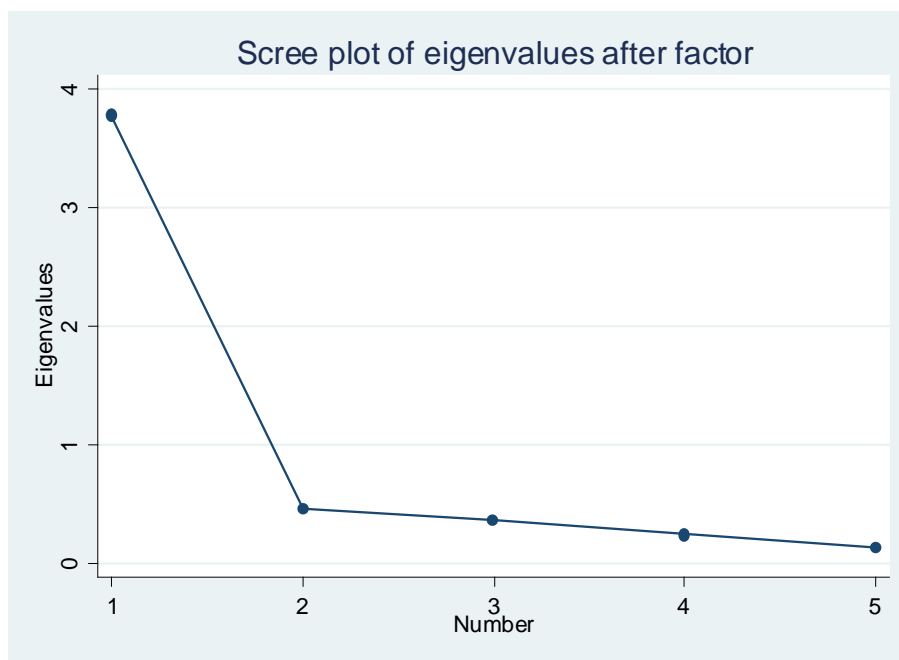

## RELIGIOSITY OF HPS

| Variable name  | Item text                                                                                                                                                                                                                      | Factor loading | Uniqueness |
|----------------|--------------------------------------------------------------------------------------------------------------------------------------------------------------------------------------------------------------------------------|----------------|------------|
| <b>B23inc</b>  | To what extent do you consider yourself a religious person?<br><br>1. Not religious at all<br>2. Slightly religious<br>3. Moderately religious<br>4. Very religious                                                            | 0.8172         | 0.3322     |
| <b>B32dinc</b> | To what extent do you agree with the following statements. <b>My religious beliefs influence my practice of medicine</b><br><br>1. Strongly disagree<br>2. Disagree<br>3. Agree<br>4. Strongly agree                           | 0.8805         | 0.2246     |
| <b>B32ginc</b> | To what extent do you agree with the following statements. <b>I try hard to carry my religious beliefs over into all my other dealings in life</b><br><br>1. Strongly disagree<br>2. Disagree<br>3. Agree<br>4. Strongly agree | 0.8747         | 0.2348     |
| <b>B32hinc</b> | To what extent do you agree with the following statements. <b>My whole approach to life is based on my religion</b><br><br>1. Strongly disagree<br>2. Disagree<br>3. Agree<br>4. Strongly agree                                | 0.8857         | 0.2155     |

## DETAILS OF FACTOR ANALYSIS

| Detail                  | Value                       |
|-------------------------|-----------------------------|
| <b>Number of obs</b>    | 4107                        |
| <b>Method</b>           | principal-component factors |
| <b>Retained factors</b> | 1                           |
| <b>Rotation</b>         | (unrotated)                 |
| <b>Number of params</b> | 4                           |

| Factor          | Eigenvalue |
|-----------------|------------|
| <b>Factor 1</b> | 2.99287    |
| <b>Factor 2</b> | 0.42921    |
| <b>Factor 3</b> | 0.30069    |
| <b>Factor 4</b> | 0.27722    |

## SCREE PLOT

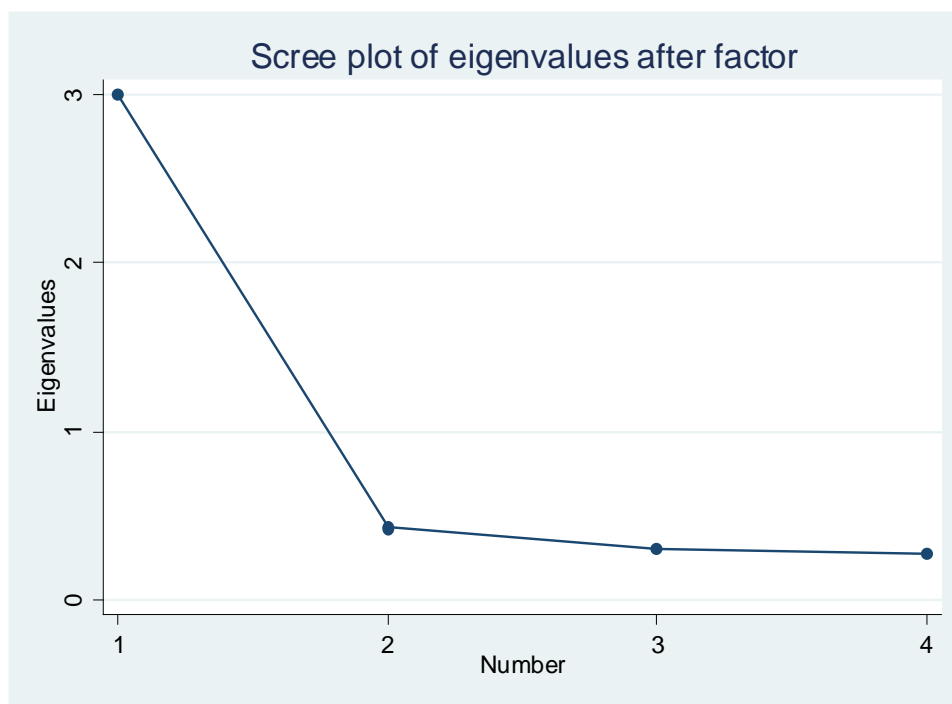

## WILLINGNESS TO INTERACT WITH PATIENTS REGARDING R/S

| Variable name | Item text                                                                                                                                                                                                                                                              | Factor loading | Uniqueness |
|---------------|------------------------------------------------------------------------------------------------------------------------------------------------------------------------------------------------------------------------------------------------------------------------|----------------|------------|
| <b>A13a</b>   | Do you ever inquire about patients religious/spiritual issues?<br><br>1. Strongly disagree<br>2. Disagree<br>3. Agree<br>4. Strongly agree                                                                                                                             | 0.7302         | 0.4669     |
| <b>A14a</b>   | When a patient <b>presents with a minor illness or injury</b> , you inquire about r/s issues: (In the following clinical situations, how often do you inquire about religious/spiritual issues?)<br><br>1. Never<br>2. Rarely<br>3. Sometimes<br>4. Often<br>5. Always | 0.7217         | 0.4792     |
| <b>A14b</b>   | When a patient <b>faces a frightening diagnosis or crisis</b> , you inquire about r/s issues: (In the following clinical situations, how often do you inquire about religious/spiritual issues?)<br><br>1. Never<br>2. Rarely<br>3. Sometimes<br>4. Often<br>5. Always | 0.7331         | 0.4625     |
| <b>A14d</b>   | When a patient <b>suffers from anxiety or depression</b> , you inquire about r/s issues: (In the following clinical situations, how often do you inquire about religious/spiritual issues?)<br><br>1. Never<br>2. Rarely<br>3. Sometimes<br>4. Often<br>5. Always      | 0.7634         | 0.4172     |
| <b>A14e</b>   | When a patient <b>comes for a history and physical</b> , you inquire about r/s issues: (In the following clinical situations, how often do you inquire about religious/spiritual issues?)<br><br>1. Never<br>2. Rarely<br>3. Sometimes<br>4. Often<br>5. Always        | 0.7471         | 0.4418     |

## DETAILS OF FACTOR ANALYSIS

| Detail           | Value                       |
|------------------|-----------------------------|
| Number of obs    | 1649                        |
| Method           | principal-component factors |
| Retained factors | 1                           |
| Rotation         | (unrotated)                 |
| Number of params | 5                           |

| Factor   | Eigenvalue |
|----------|------------|
| Factor 1 | 2.73249    |
| Factor 2 | 0.79436    |
| Factor 3 | 0.58488    |
| Factor 4 | 0.47326    |
| Factor 5 | 0.41501    |

## SCREE PLOT

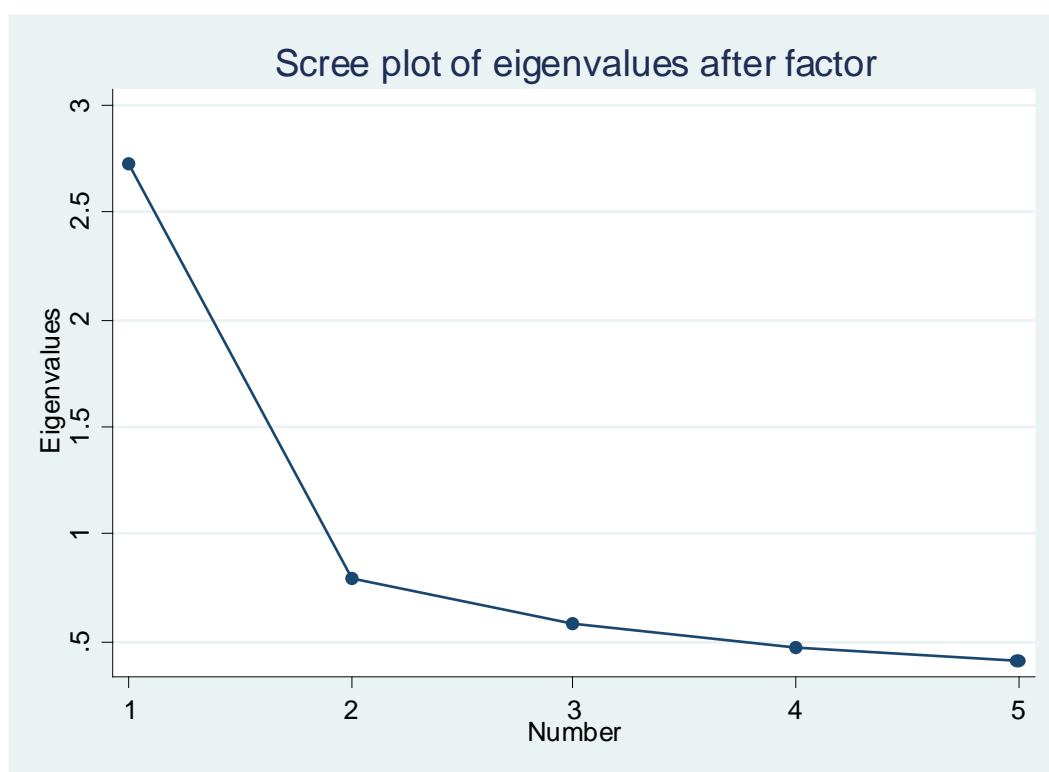

## RELIGIOUS OBJECTIONS TO CONTROVERSIAL ISSUES IN MEDICINE

| Variable name | Item text                                                                                                                                          | Factor loading | Uniqueness |
|---------------|----------------------------------------------------------------------------------------------------------------------------------------------------|----------------|------------|
| <b>A21a</b>   | Please note if you object to <b>Physician assisted suicide</b><br>0. Has no religious objections<br>1. Has religious objections                    | 0.7914         | 0.3737     |
| <b>A21b</b>   | Please note if you object to <b>Sedation to unconsciousness in dying patients</b><br>0. Has no religious objections<br>1. Has religious objections | 0.6372         | 0.5940     |
| <b>A21c</b>   | Please note if you object to <b>Withdrawal of artificial life support</b><br>0. Has no religious objections<br>1. Has religious objections         | 0.6259         | 0.6083     |
| <b>A21d</b>   | Please note if you object to <b>Abortion for congenital abnormalities</b><br>0. Has no religious objections<br>1. Has religious objections         | 0.7826         | 0.3875     |
| <b>A21e</b>   | Please note if you object to <b>Abortion after failed contraception</b><br>0. Has no religious objections<br>1. Has religious objections           | 0.7984         | 0.3626     |

### DETAILS OF FACTOR ANALYSIS

| Detail                  | Value                       |
|-------------------------|-----------------------------|
| <b>Number of obs</b>    | 3834                        |
| <b>Method</b>           | principal-component factors |
| <b>Retained factors</b> | 1                           |
| <b>Rotation</b>         | (unrotated)                 |
| <b>Number of params</b> | 5                           |

| Factor          | Eigenvalue |
|-----------------|------------|
| <b>Factor 1</b> | 2.67407    |
| <b>Factor 2</b> | 0.86723    |
| <b>Factor 3</b> | 0.61773    |
| <b>Factor 4</b> | 0.49686    |
| <b>Factor 5</b> | 0.34410    |



## SCREE PLOT

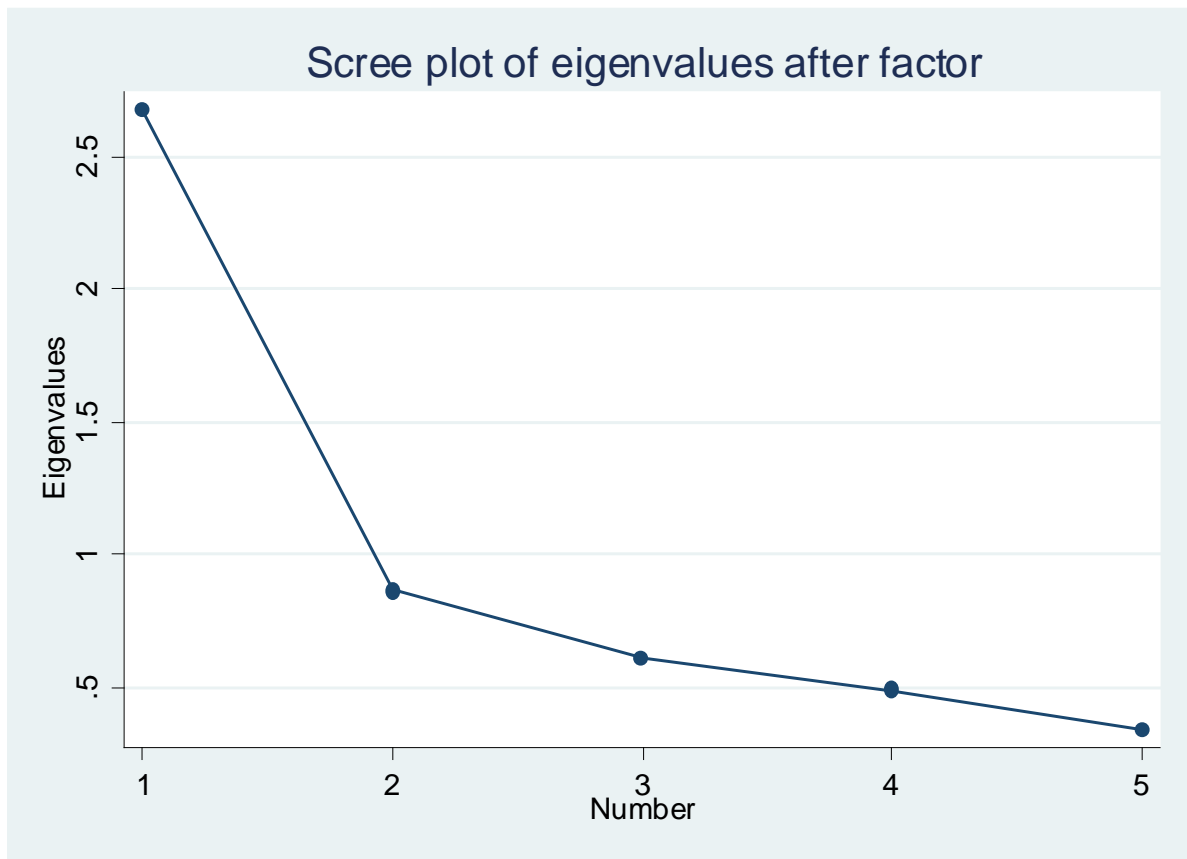

## R/S AS A Calling

| Variable name | Item text                                                                                                                                                                                                                      | Factor loading | Uniqueness |
|---------------|--------------------------------------------------------------------------------------------------------------------------------------------------------------------------------------------------------------------------------|----------------|------------|
| <b>B32c</b>   | To what extent do you agree with the following statements. <b>For me, the practice of medicin is a calling</b><br><br>1. Strongly disagree<br>2. Disagree<br>3. Agree<br>4. Strongly agree                                     | 0.5421         | 0.7062     |
| <b>B32d</b>   | To what extent do you agree with the following statements. <b>My religious beliefs influence my practice of medicine</b><br><br>1. Strongly disagree<br>2. Disagree<br>3. Agree<br>4. Strongly agree                           | 0.8912         | 0.2057     |
| <b>B32g</b>   | To what extent do you agree with the following statements. <b>I try hard to carry my religious beliefs over into all my other dealings in life</b><br><br>1. Strongly disagree<br>2. Disagree<br>3. Agree<br>4. Strongly agree | 0.8739         | 0.2363     |
| <b>B32h</b>   | To what extent do you agree with the following statements. <b>My whole approach to life is based on my religion</b><br><br>1. Strongly disagree<br>2. Disagree<br>3. Agree<br>4. Strongly agree                                | 0.8835         | 0.2194     |

## DETAILS OF FACTOR ANALYSIS

| Detail           | Value                       |
|------------------|-----------------------------|
| Number of obs    | 4197                        |
| Method           | principal-component factors |
| Retained factors | 1                           |
| Rotation         | (unrotated)                 |
| Number of params | 4                           |

| Factor   | Eigenvalue |
|----------|------------|
| Factor 1 | 2.63233    |
| Factor 2 | 0.80358    |
| Factor 3 | 0.28971    |
| Factor 4 | 0.27437    |

## SCREE PLOT

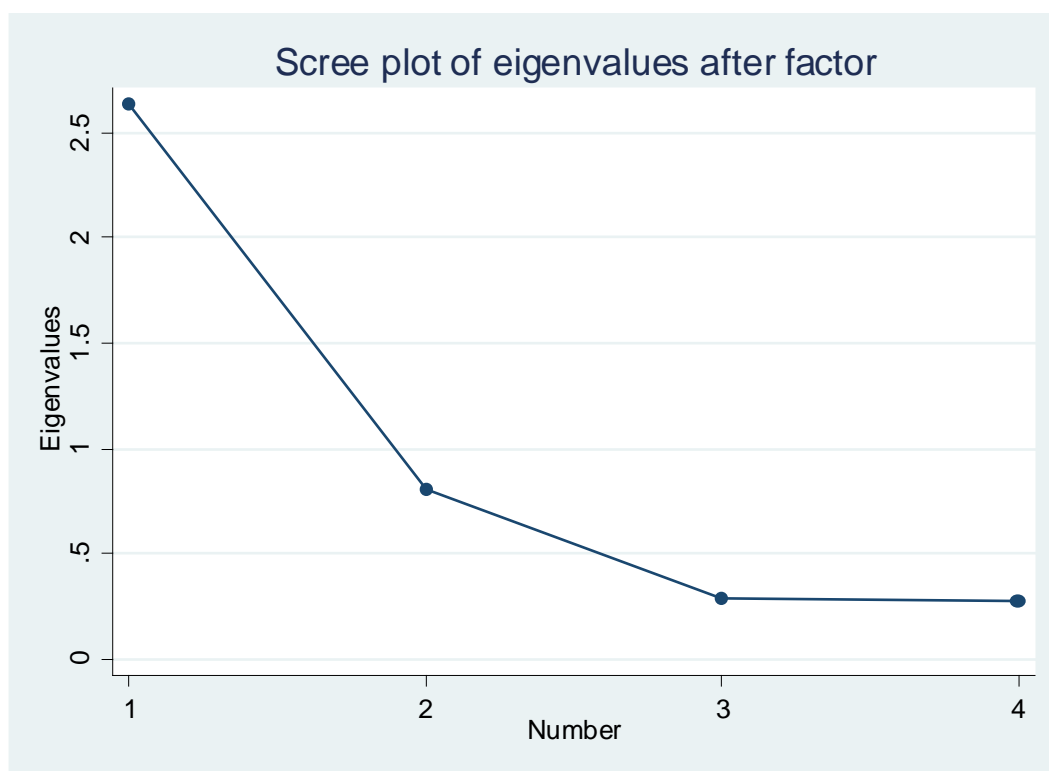

Supplement: s1 [file s1]
