# Supplementary material
Source: MDPI journal article supplement (https://www.mdpi.com/2077-1444/8/2/24)
Supplement: s1 [file s1]

### Original RSMPP Variables

[illegible]

[illegible]





[illegible]

[illegible]

[illegible]

[illegible]



[illegible]

|               |                                                                                                                                              |                 |              |                       |     |       |            |       |        |                          |                        |                        |         |         |                  |              |               |             | NERSH Data Pool |
|---------------|----------------------------------------------------------------------------------------------------------------------------------------------|-----------------|--------------|-----------------------|-----|-------|------------|-------|--------|--------------------------|------------------------|------------------------|---------|---------|------------------|--------------|---------------|-------------|-----------------|
| Variable name | Question in questionnaire                                                                                                                    | Stata data type | Type of data | Range in org. dataset | USA | India | Indo-nesia | Congo | Brazil | Germany Munich Perinatal | Germany Munich Turkish | Germany Munich Transp. | Austria | Denmark | Germany Freiburg | Saudi Arabia | Brazil nurses | New Zealand |                 |
| sau13         | When, if ever, is it appropriate for a physician to initiate discussion with patients about religious beliefs or experiences with a patient? | byte            | Ordinal      | 1-4                   |     |       |            |       |        |                          |                        |                        |         |         |                  |              |               |             |                 |
| sau17c        | Addition to A18. Unsuitable environment.                                                                                                     | byte            | Boolean      | 0-1                   |     |       |            |       |        |                          |                        |                        |         |         |                  |              |               |             |                 |
| dk17          | How often do you talk with patients about topics related to faith or religion?                                                               | byte            | Ordinal      | 1-8                   |     |       |            |       |        |                          |                        |                        |         |         |                  |              |               |             |                 |

[illegible]

[illegible]

[illegible]

[illegible]

[illegible]

[illegible]

[illegible]



[illegible]

[illegible]

[illegible]

[illegible]

[illegible]

[illegible]

[illegible]

[illegible]



[illegible]

[illegible]

[illegible]
