# Supplementary material
Source: MDPI journal article supplement (https://www.mdpi.com/2077-1444/8/2/24)
Supplement: s1 [file s1]

Archive with 2 entries (2 files):
- Supplemental material - variables.pdf
- Supplemental material - scales.pdf
